# Supplementary material for: Converging ligand‐binding free energies obtained with free‐energy perturbations at the quantum mechanical level
Source: PubMed Central journal article supplement — J Comput Chem. 2016 Apr 27;37(17):1589–600. doi: 10.1002/jcc.24375 (PMC5074236; doi:10.1002/jcc.24375), 2016-04-27
Supplement: JCC-37-1589-s001.pdf [file JCC-37-1589-s001.pdf]

**Converging ligand-binding free energies obtained with free-energy  
perturbations at the quantum mechanical level**

**Supplementary material**

**Martin A. Olsson<sup>1</sup>, Pär Söderhjelm<sup>2</sup>, Ulf Ryde<sup>1,\*</sup>**

<sup>1</sup>Department of Theoretical Chemistry, Lund University, Chemical Centre, P. O. Box 124,  
SE-221 00 Lund, Sweden

<sup>2</sup>Department of Biophysical Chemistry, Lund University, Chemical Centre, P. O. Box 124,  
SE-221 00 Lund, Sweden

Correspondence to Ulf Ryde, E-mail: [Ulf.Ryde@teokem.lu.se](mailto:Ulf.Ryde@teokem.lu.se),

Tel: +46 – 46 2224502, Fax: +46 – 46 2228648

2016-03-08

**Figure S1.** Distribution (left) and normality-probability plots (right) for three typical  $E_{QM} - E_{MM}$  results: Ligand Hep from the simulation with the host (top; from the Hep→Hx perturbation), ligand Pen without the host (centre; from the Hx→Pen perturbation), and ligand Bz from the simulation with the host (bottom; from the MeBz→Bz perturbation). The plots were constructed by Matlab.

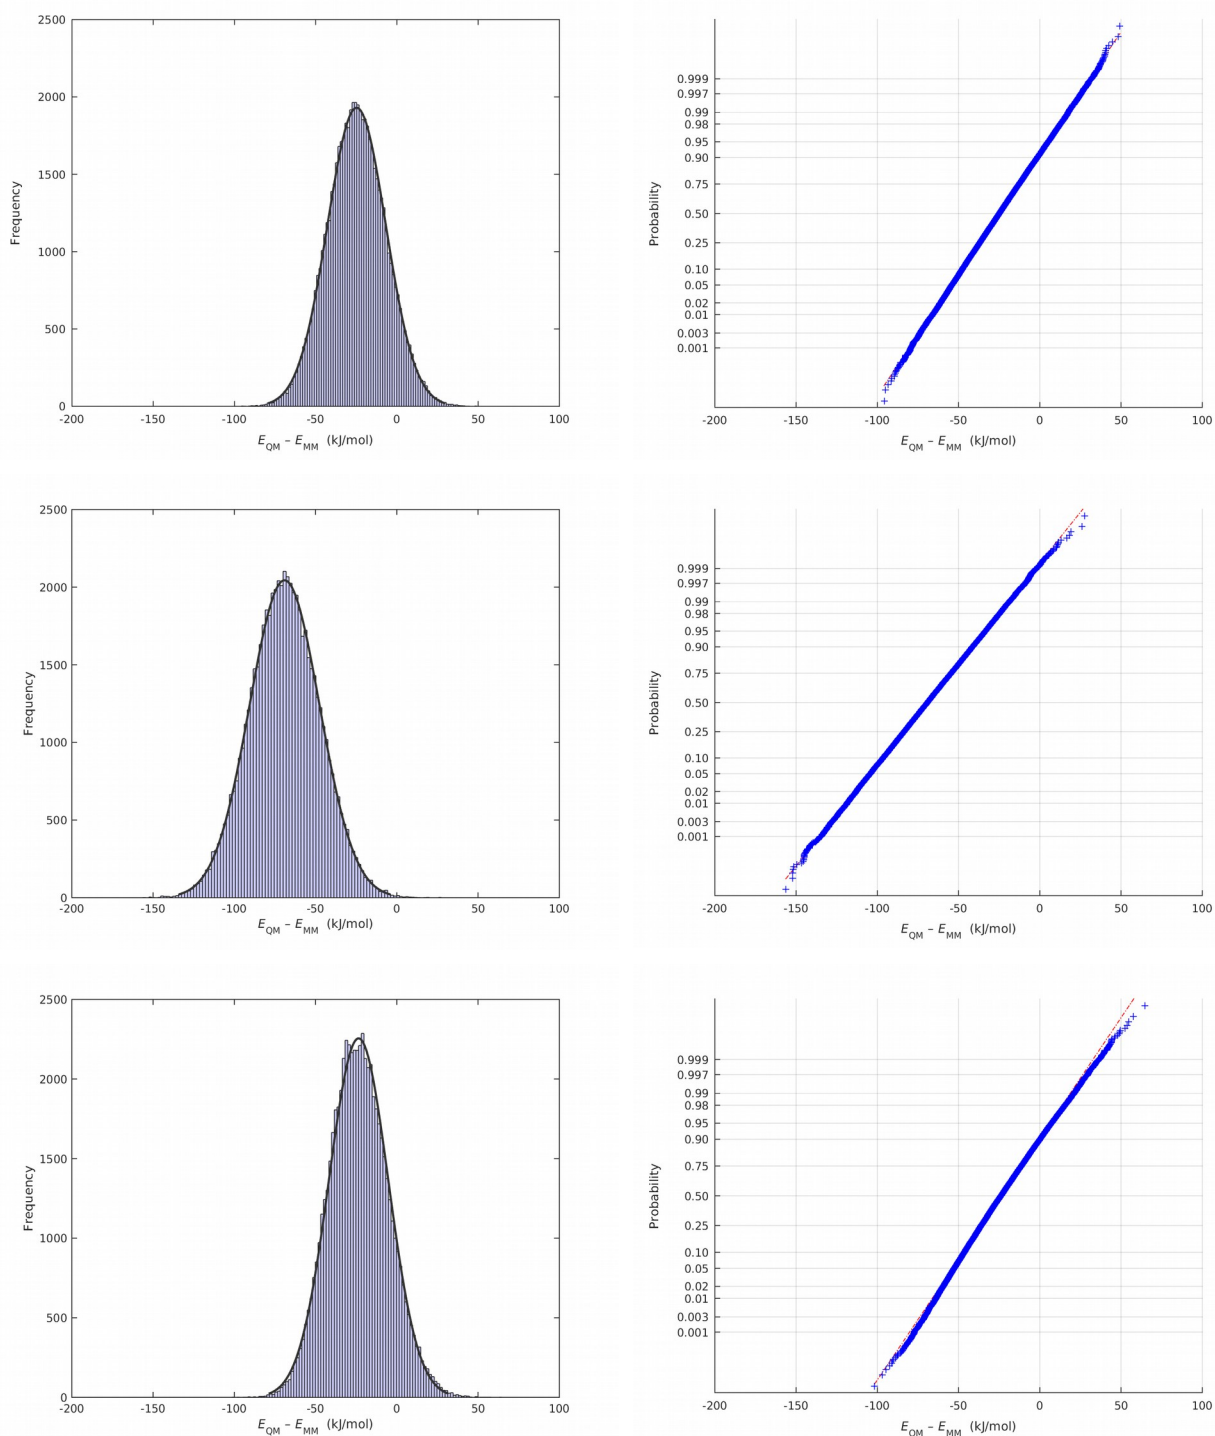

**Table S1.** AMBER topology file for the NOA host. The third column is the GAFF atom type and the last column is the charge.

```

0      0      2
noa.dat
NOA, with RESP charges, 5/3-14
noa.dat
  OAO INT      1
CHANGE OMIT DU  BEG
0.00000
  1 DUMM DU M 0.0000 0.0000 .0000 .0000
  2 DUMM DU M 0.0000 1.0000 .0000 .0000
  3 DUMM DU M 1.0000 1.0000 .0000 .0000
  4 C55 ca M -1.5220 3.2080 -4.2130 -0.137304
  5 H28 ha E -0.9350 3.9470 -3.6740 0.077201
  6 C42 ca M -2.4280 2.4090 -3.5740 -0.011167
  7 C56 ca S -3.2280 1.6060 -4.2980 -0.137304
  8 H29 ha E -4.1010 1.1070 -3.8840 0.077201
  9 C9 c3 M -2.6020 2.4590 -2.0300 0.114807
10 O3 os E -2.3830 3.7840 -1.5580 -0.224878
11 H19 h2 E -1.7860 1.8200 -1.6630 0.135169
12 O1 os M -3.8870 1.8990 -1.6480 -0.224878
13 C3 ca M -3.9100 1.1440 -0.5370 0.066965
14 C1 ca M -3.8090 -0.1940 -0.7940 -0.182589
15 H1 ha E -3.7770 -0.4960 -1.8380 0.203172
16 C4 ca M -3.5960 -1.0770 0.2820 0.066965
17 O2 os E -3.5150 -2.4080 -0.0920 -0.224878
18 C5 ca M -3.5760 -0.6530 1.6280 0.062476
19 C7 c3 3 -3.4220 -1.7270 2.6740 -0.029682
20 H12 hc E -4.0350 -1.4450 4.1080 0.057240
21 C32 ca S -1.9080 -2.1060 2.8250 0.062476
22 C31 ca S -1.0700 -1.3980 3.6830 -0.311116
23 H56 ha E -1.4800 -0.5880 4.2800 0.175692
24 H4 hc E -4.0520 -2.5450 2.3190 0.057240
25 C2 ca M -3.6140 0.7180 1.8500 -0.311116
26 H2 ha E -3.5190 1.1430 2.8460 0.175692
27 C6 ca M -3.8150 1.6430 0.7650 0.062476
28 C8 c3 M -3.5870 3.1110 1.0700 -0.029682
29 H13 hc E -4.2140 3.7790 2.3520 0.057240
30 H3 hc E -4.0610 3.5940 0.2130 0.057240
31 C10 ca M -2.1180 3.3410 0.8270 0.062476
32 C15 ca S -1.2000 3.2470 1.8990 -0.311116
33 H5 ha E -1.4830 2.7760 2.8370 0.175692
34 C14 ca M -1.6790 3.8550 -0.3830 0.066965
35 C17 ca M -0.3540 4.2700 -0.5020 -0.182589
36 H6 ha E -0.0230 4.5760 -1.4910 0.203172
37 C13 ca M 0.5180 4.3050 0.5390 0.066965
38 O4 os S 1.9160 4.5440 0.3420 -0.224878
39 C34 c3 3 2.7380 3.3120 0.0870 0.114807
40 C41 ca B 3.7170 3.4890 -1.0630 -0.011167
41 C50 ca S 4.9700 2.8340 -1.1090 -0.137304
42 H25 ha E 5.2320 2.2220 -0.2500 0.077201
43 C51 ca S 3.2900 4.1570 -2.1870 -0.137304
44 H26 ha E 2.3190 4.6440 -2.1600 0.077201
45 O5 os E 3.3430 2.9830 1.3450 -0.224878
46 H18 h2 E 2.1180 2.4680 -0.2510 0.135169
47 C16 ca M 0.0690 3.7170 1.7650 0.062476
48 C18 c3 M 0.9430 3.6670 3.0350 -0.029682
49 H14 hc E 0.2660 4.1450 4.3360 0.057240
50 H7 hc E 1.7670 4.3580 2.8390 0.057240
51 C19 ca M 1.6220 2.2760 2.9700 0.062476
52 C23 ca S 1.0540 1.2190 3.7130 -0.311116
53 H8 ha E 0.1680 1.3470 4.3280 0.175692
54 C22 ca M 2.7970 2.0530 2.2300 0.066965
55 C25 ca M 3.4100 0.8020 2.2740 -0.182589
56 H9 ha E 4.2770 0.6000 1.6510 0.203172
57 C21 ca M 2.9540 -0.1560 3.1840 0.066965
58 O6 os S 3.5260 -1.3650 2.9920 -0.224878
59 C38 c3 3 2.8680 -2.3720 2.1430 0.114807
60 C40 ca B 3.7410 -3.0970 1.1560 -0.011167
61 C45 ca S 4.6920 -2.4430 0.4170 -0.137304

```

|     |     |    |   |         |         |         |           |
|-----|-----|----|---|---------|---------|---------|-----------|
| 62  | H22 | ha | E | 4.8000  | -1.3670 | 0.5280  | 0.077201  |
| 63  | C46 | ca | S | 3.7040  | -4.5050 | 0.9540  | -0.137304 |
| 64  | H23 | ha | E | 3.0520  | -5.1060 | 1.5820  | 0.077201  |
| 65  | O7  | os | E | 2.0630  | -3.1990 | 3.0450  | -0.224878 |
| 66  | H20 | h2 | E | 2.1440  | -1.8390 | 1.5090  | 0.135169  |
| 67  | C24 | ca | M | 1.8100  | 0.0410  | 3.8860  | 0.062476  |
| 68  | C26 | c3 | M | 1.2020  | -1.0390 | 4.7470  | -0.029682 |
| 69  | H15 | hc | E | 0.5170  | -0.7400 | 6.1700  | 0.057240  |
| 70  | H10 | hc | E | 2.0710  | -1.6340 | 5.0360  | 0.057240  |
| 71  | C28 | ca | M | 0.2870  | -1.7610 | 3.8000  | 0.062476  |
| 72  | C30 | ca | M | 0.7650  | -2.8410 | 3.0580  | 0.066965  |
| 73  | C33 | ca | M | -0.0940 | -3.5100 | 2.1790  | -0.182589 |
| 74  | H11 | ha | E | 0.2760  | -4.3380 | 1.5800  | 0.203172  |
| 75  | C29 | ca | M | -1.3960 | -3.1670 | 2.0210  | 0.066965  |
| 76  | O8  | os | M | -2.2010 | -3.7230 | 1.1090  | -0.224878 |
| 77  | C39 | c3 | M | -2.2460 | -3.0170 | -0.1190 | 0.114807  |
| 78  | H21 | h2 | E | -1.4410 | -2.2680 | -0.1360 | 0.135169  |
| 79  | C43 | ca | M | -2.1220 | -3.8470 | -1.3610 | -0.011167 |
| 80  | C61 | ca | S | -2.8770 | -3.6480 | -2.4770 | -0.137304 |
| 81  | H32 | ha | E | -3.5880 | -2.8250 | -2.4940 | 0.077201  |
| 82  | C60 | ca | M | -1.1610 | -4.8870 | -1.5080 | -0.137304 |
| 83  | H31 | ha | E | -0.4580 | -5.0240 | -0.6910 | 0.077201  |
| 84  | C63 | ca | M | -1.0570 | -5.6870 | -2.6250 | 0.170479  |
| 85  | O16 | os | E | -0.0010 | -6.5630 | -2.7380 | -0.295814 |
| 86  | C59 | ca | M | -1.7870 | -5.3340 | -3.7420 | -0.166592 |
| 87  | H33 | ha | E | -1.5690 | -5.8270 | -4.6860 | 0.155458  |
| 88  | C62 | ca | M | -2.6680 | -4.2930 | -3.7170 | 0.170479  |
| 89  | O15 | os | M | -3.2710 | -3.9870 | -4.9160 | -0.295814 |
| 90  | C77 | ca | M | -4.0610 | -2.9060 | -5.1440 | 0.129911  |
| 91  | C74 | ca | S | -3.4630 | -1.7490 | -5.6080 | -0.125196 |
| 92  | H37 | ha | E | -2.3900 | -1.5760 | -5.6390 | 0.161643  |
| 93  | C73 | ca | M | -5.3960 | -3.1620 | -5.3070 | -0.070243 |
| 94  | H39 | ha | E | -5.8020 | -4.1500 | -5.1040 | 0.152216  |
| 95  | C76 | ca | M | -6.2480 | -2.1320 | -5.6650 | -0.271146 |
| 96  | H78 | ha | E | -7.7260 | -2.3950 | -5.6970 | 0.175048  |
| 97  | C75 | ca | M | -5.6930 | -0.8190 | -5.9550 | -0.070243 |
| 98  | H38 | ha | E | -6.2600 | 0.0840  | -6.1660 | 0.152216  |
| 99  | C65 | ca | M | -4.3320 | -0.6840 | -5.8620 | 0.129911  |
| 100 | O13 | os | M | -3.8470 | 0.5350  | -6.3550 | -0.295814 |
| 101 | C57 | ca | M | -2.9710 | 1.3190  | -5.6770 | 0.170479  |
| 102 | C54 | ca | M | -1.8770 | 1.9370  | -6.2420 | -0.166592 |
| 103 | H30 | ha | E | -1.5790 | 1.6560  | -7.2490 | 0.155458  |
| 104 | C58 | ca | M | -1.1840 | 2.8990  | -5.5540 | 0.170479  |
| 105 | O14 | os | M | -0.2710 | 3.6030  | -6.3370 | -0.295814 |
| 106 | C71 | ca | M | 0.4830  | 4.5680  | -5.7770 | 0.129911  |
| 107 | C70 | ca | S | 1.8070  | 4.3690  | -5.3040 | -0.125196 |
| 108 | H35 | ha | E | 2.2100  | 3.3690  | -5.4340 | 0.161643  |
| 109 | C68 | ca | M | -0.0980 | 5.8230  | -5.7250 | -0.070243 |
| 110 | H36 | ha | E | -1.1120 | 5.9550  | -6.0950 | 0.152216  |
| 111 | C72 | ca | M | 0.6450  | 6.9110  | -5.2020 | -0.271146 |
| 112 | H91 | ha | E | 0.0390  | 8.2950  | -5.3010 | 0.175048  |
| 113 | C69 | ca | M | 1.9590  | 6.6470  | -4.7050 | -0.070243 |
| 114 | H34 | ha | E | 2.5290  | 7.4240  | -4.2020 | 0.152216  |
| 115 | C64 | ca | M | 2.5180  | 5.3940  | -4.7170 | 0.129911  |
| 116 | O11 | os | M | 3.8140  | 5.1790  | -4.2690 | -0.295814 |
| 117 | C52 | ca | M | 4.1400  | 4.3350  | -3.2140 | 0.170479  |
| 118 | C49 | ca | M | 5.3730  | 3.6990  | -3.1920 | -0.166592 |
| 119 | H27 | ha | E | 5.9960  | 3.9250  | -4.0530 | 0.155458  |
| 120 | C53 | ca | M | 5.8060  | 2.9660  | -2.1720 | 0.170479  |
| 121 | O12 | os | M | 6.9260  | 2.1980  | -2.4430 | -0.295814 |
| 122 | C89 | ca | M | 7.1340  | 1.1040  | -1.6430 | 0.129911  |
| 123 | C86 | ca | S | 6.6520  | -0.1000 | -2.0110 | -0.125196 |
| 124 | H43 | ha | E | 6.1020  | -0.1680 | -2.9460 | 0.161643  |
| 125 | C85 | ca | M | 8.0540  | 1.1990  | -0.5600 | -0.070243 |
| 126 | H45 | ha | E | 8.4490  | 2.1800  | -0.3090 | 0.152216  |
| 127 | C88 | ca | M | 8.3250  | 0.1190  | 0.2670  | -0.271146 |
| 128 | H90 | ha | E | 8.9880  | 0.2140  | 1.6550  | 0.175048  |
| 129 | C87 | ca | M | 7.7270  | -1.0940 | -0.1070 | -0.070243 |
| 130 | H44 | ha | E | 7.8830  | -1.9790 | 0.5050  | 0.152216  |
| 131 | C67 | ca | M | 6.8860  | -1.2180 | -1.1970 | 0.129911  |
| 132 | O10 | os | M | 6.3190  | -2.4960 | -1.3660 | -0.295814 |
| 133 | C48 | ca | M | 5.4160  | -3.0580 | -0.5800 | 0.170479  |

|     |     |    |   |         |         |         |           |
|-----|-----|----|---|---------|---------|---------|-----------|
| 134 | C44 | ca | M | 5.1650  | -4.3950 | -0.9060 | -0.166592 |
| 135 | H24 | ha | E | 5.6610  | -4.9270 | -1.7140 | 0.155458  |
| 136 | C47 | ca | M | 4.2660  | -5.1190 | -0.1630 | 0.170479  |
| 137 | O9  | os | M | 4.1460  | -6.4310 | -0.3410 | -0.295814 |
| 138 | C83 | ca | M | 2.9300  | -6.9620 | -0.4970 | 0.129911  |
| 139 | C79 | ca | M | 2.3990  | -7.8210 | 0.3850  | -0.070243 |
| 140 | H42 | ha | E | 3.0780  | -8.2120 | 1.1390  | 0.152216  |
| 141 | C82 | ca | M | 1.1080  | -8.2640 | 0.3810  | -0.271146 |
| 142 | H84 | ha | E | 0.6290  | -9.2780 | 1.4400  | 0.175048  |
| 143 | C81 | ca | M | 0.2650  | -7.7360 | -0.6370 | -0.070243 |
| 144 | H41 | ha | E | -0.7330 | -8.1450 | -0.7710 | 0.152216  |
| 145 | C66 | ca | M | 0.7510  | -6.9350 | -1.6650 | 0.129911  |
| 146 | C80 | ca | M | 2.0660  | -6.4710 | -1.4940 | -0.125196 |
| 147 | H40 | ha | E | 2.3850  | -5.6980 | -2.1880 | 0.161643  |

LOOP

|     |     |
|-----|-----|
| C58 | C55 |
| C57 | C56 |
| C14 | O3  |
| C6  | C3  |
| C39 | O2  |
| C29 | C32 |
| C28 | C31 |
| C16 | C15 |
| C53 | C50 |
| C52 | C51 |
| C22 | O5  |
| C24 | C23 |
| C48 | C45 |
| C47 | C46 |
| C30 | O7  |
| C62 | C61 |
| C66 | O16 |
| C65 | C74 |
| C64 | C70 |
| C67 | C86 |
| C80 | C83 |

IMPROPER

|     |     |     |     |
|-----|-----|-----|-----|
| C58 | C42 | C55 | H28 |
| C9  | C55 | C42 | C56 |
| C57 | C42 | C56 | H29 |
| C1  | C6  | C3  | O1  |
| C3  | C4  | C1  | H1  |
| C1  | C5  | C4  | O2  |
| C7  | C4  | C5  | C2  |
| C7  | C29 | C32 | C31 |
| C28 | C32 | C31 | H56 |
| C5  | C6  | C2  | H2  |
| C8  | C3  | C6  | C2  |
| C8  | C15 | C10 | C14 |
| C10 | C16 | C15 | H5  |
| C10 | C17 | C14 | O3  |
| C14 | C13 | C17 | H6  |
| C17 | C16 | C13 | O4  |
| C34 | C50 | C41 | C51 |
| C53 | C41 | C50 | H25 |
| C52 | C41 | C51 | H26 |
| C18 | C15 | C16 | C13 |
| C18 | C23 | C19 | C22 |
| C19 | C24 | C23 | H8  |
| C19 | C25 | C22 | O5  |
| C22 | C21 | C25 | H9  |
| C25 | C24 | C21 | O6  |
| C38 | C45 | C40 | C46 |
| C48 | C40 | C45 | H22 |
| C47 | C40 | C46 | H23 |
| C26 | C23 | C24 | C21 |
| C26 | C30 | C28 | C31 |
| C28 | C33 | C30 | O7  |
| C30 | C29 | C33 | H11 |

|     |     |     |     |
|-----|-----|-----|-----|
| C33 | C32 | C29 | O8  |
| C39 | C61 | C43 | C60 |
| C43 | C62 | C61 | H32 |
| C43 | C63 | C60 | H31 |
| C60 | C59 | C63 | O16 |
| C63 | C62 | C59 | H33 |
| C61 | C59 | C62 | O15 |
| C74 | C73 | C77 | O15 |
| C77 | C65 | C74 | H37 |
| C77 | C76 | C73 | H39 |
| H78 | C73 | C76 | C75 |
| C76 | C65 | C75 | H38 |
| C74 | C75 | C65 | O13 |
| C54 | C56 | C57 | O13 |
| C57 | C58 | C54 | H30 |
| C54 | C55 | C58 | O14 |
| C70 | C68 | C71 | O14 |
| C71 | C64 | C70 | H35 |
| C71 | C72 | C68 | H36 |
| H91 | C68 | C72 | C69 |
| C72 | C64 | C69 | H34 |
| C70 | C69 | C64 | O11 |
| C49 | C51 | C52 | O11 |
| C52 | C53 | C49 | H27 |
| C49 | C50 | C53 | O12 |
| C86 | C85 | C89 | O12 |
| C89 | C67 | C86 | H43 |
| C89 | C88 | C85 | H45 |
| H90 | C85 | C88 | C87 |
| C88 | C67 | C87 | H44 |
| C86 | C87 | C67 | O10 |
| C44 | C45 | C48 | O10 |
| C48 | C47 | C44 | H24 |
| C44 | C46 | C47 | O9  |
| C79 | C80 | C83 | O9  |
| C83 | C82 | C79 | H42 |
| H84 | C79 | C82 | C81 |
| C82 | C66 | C81 | H41 |
| C81 | C80 | C66 | O16 |
| C83 | C66 | C80 | H40 |

DONE  
STOP

**Table S2.**  $\Delta G_{MM \rightarrow QM}$  energy estimates (kJ/mol) for the various simulations involving the same ligand with or without the host, employing all 60 000 snapshots. The reported values for the individual simulations are ssEAc estimates with bootstrapped error estimates. The error estimate of the averages are the standard deviation divided by the square root of the number of instances (2 or 4). The  $\Delta \Delta G_{MM \rightarrow QM}$  results in Table 3 in the main article are obtained from the difference of  $\Delta G_{MM \rightarrow QM}$  values for the two ligands and for the simulations with and without host (for example, the  $\Delta \Delta G_{MM \rightarrow QM}$  results for Hx  $\rightarrow$  Bz is  $-91.51 - (-85.11) - (-162.42 - (-171.53)) = -15.51$  kJ/mol). Deviating values are marked in bold face.

| Ligand | Simulation              | with host         | without host              |
|--------|-------------------------|-------------------|---------------------------|
| Bz     | MeBz $\rightarrow$ Bz   | -90.18 $\pm$ 0.38 | <b>-156.98</b> $\pm$ 0.60 |
|        | pClBz $\rightarrow$ Bz  | -90.81 $\pm$ 0.39 | -161.59 $\pm$ 0.61        |
|        | mClBz $\rightarrow$ Bz  | -90.11 $\pm$ 0.39 | -162.36 $\pm$ 0.62        |
|        | Hx $\rightarrow$ Bz     | -91.51 $\pm$ 0.38 | -162.42 $\pm$ 0.62        |
|        | Average                 | -90.65 $\pm$ 0.33 | -160.84 $\pm$ 1.30        |
| MeBz   | MeBz $\rightarrow$ Bz   | -89.04 $\pm$ 0.37 | <b>-169.58</b> $\pm$ 0.60 |
|        | EtBz $\rightarrow$ MeBz | -89.04 $\pm$ 0.37 | <b>-164.25</b> $\pm$ 0.61 |
|        | Average                 | -89.04 $\pm$ 0.00 | -166.92 $\pm$ 2.67        |
| Hx     | Hx $\rightarrow$ Bz     | -85.11 $\pm$ 0.39 | -171.53 $\pm$ 0.56        |
|        | MeHx $\rightarrow$ Hx   | -82.37 $\pm$ 0.39 | <b>-163.15</b> $\pm$ 0.51 |
|        | Pen $\rightarrow$ Hx    | -84.49 $\pm$ 0.39 | -172.84 $\pm$ 0.55        |
|        | Hep $\rightarrow$ Hx    | -84.19 $\pm$ 0.38 | -171.49 $\pm$ 0.54        |
|        | Average                 | -84.04 $\pm$ 0.59 | -169.75 $\pm$ 2.22        |
